# Supplementary material for: Marine Ostracod Provinciality in the Late Ordovician of Palaeocontinental Laurentia and Its Environmental and Geographical Expression
Source: PLoS One. 2012 Aug 10;7(8):e41682. doi: 10.1371/journal.pone.0041682 (PMC3416799; doi:10.1371/journal.pone.0041682)
Supplement: Appendix S2 — Sandbian ( bicornis ) time slab ostracod dataset of palaeocontinental Laurentia. (XLSX) [file pone.0041682.s003.xlsx]

## Sheet: Sheet1
				Localities	Loc 1 b	Loc 3b	Loc 3c	Loc 4a	Loc 4b	Loc 5	Loc 6	Loc 7	Loc 8b	Loc 9	Loc 10a	Loc 10b	Loc 10c	Loc 11	Loc 12
Ostracod groups					Virginia	Pennsylvania	Pennsylvania	Girvan	Girvan	Lexington	Bucke-Ontario	Michigan	Oklahoma	Hull-Ontario	Plattiville	Dec- Minnesota	Glenwood	F-Bay	Sillimans
	Note:In column E and row 3, symbol g stands for gracilis, b for bicornis and s represents Sandbian				b	b	b	b	b	b	b	b	b	b	b	b	b	b	b
				Palaeolat	25°S	22°S	22°S	21°S	21°S	20.5°S	17°S	13.5°S	13°S	13°S	11°S	11°S	10°S	3°N	5°N
				Palaeolong		243°	243°	291°	291°	237°	247°	242°	228°	274°	238°	238°	239°	282°	281°
				Depth	S	S	S	S	S	S	S	S	S	S	S	S	S	S	S
	Ostracod species	Short names	Weight	age
L	Baltonotella circulantus (Harris, 1957)	Bacircul	3	s	1	0	0	0	0	0	0	0	1	0	0	0	0	0	0
P	Eurychilina indivisa Levinson, 1961	Eurindiv	4	s	1	0	0	0	0	0	0	0	1	0	0	0	0	0	0
Pd	Punctaparchites rugosus (Jones, 1858)	Punrugos	3	s	0	0	0	0	0	0	0	0	1	1	0	1	0	0	1
P	Hallatia labiosa (Ulrich, 1894)	Hlabiosa	3	s	1	0	0	0	1	0	1	0	1	1	0	0	0	0	0
P	Eurychilina ventrosa Ulrich, 1894	Eurventr	4	s	0	0	0	0	0	0	1	0	1	0	1	0	0	0	0
P	Ectoprimitoides moorei (Harris, 1957)	Ecmoorei	3	s	1	0	0	0	0	0	0	0	1	0	0	0	0	0	0
O	Saccelatia millepunctata (Ulrich, 1894)	Sacmille	3	s	0	1	0	0	0	0	1	0	1	0	0	0	0	0	0
P	Eurybolbina bispinata (Harris, 1957)	Eurbispi	3	s	1	0	0	0	0	0	0	0	1	0	0	0	0	0	0
P	Eoaquapulex socialis (Levinson, 1961)	Eosocial	3	s	1	0	0	0	1	0	0	0	1	0	0	0	0	0	1
P	Eohollina depressa (Kay, 1940)	Eodepres	3	s	1	0	0	0	0	0	1	0	0	0	0	0	0	0	0
O	Leperditella rex Coryell and Schenck, 1941	Leperrex	4	s	0	1	1	0	0	0	1	0	1	0	0	0	0	0	0
Pd	Monoceratella teres Teichert, 1937	Monteres	4	s	1	1	1	0	0	0	0	0	0	0	0	0	0	1	0
Pd	Balticella deckeri (Harris, 1957)	Bdeckeri	4	s	1	0	0	1	0	0	0	0	1	0	0	0	0	0	0
Pd	Krausella variata Kraft, 1962	Kvariata	4	s	1	0	0	1	0	0	0	0	0	0	0	0	1	0	0
Pd	Krausella brevicornis (Keenan, 1951)	Kbrevico	4	s	1	0	0	0	0	0	1	0	0	0	0	0	0	0	0
P	Eurychilina strasburgensis	Estrasbu	4	s	1	1	1	0	0	0	0	0	0	0	0	0	0	0	0
Pd	Shenandoia acuminulata Kraft, 1962	Shacumin	4	s	1	1	0	0	0	0	0	0	0	0	0	0	0	0	0
L	Saccelatia arrecta Ulrich	Sarrecta	4	s	0	1	1	0	0	0	0	0	0	0	0	1	0	0	0
O	Leperditella mundula (Ulrich)	Lepmundu	4	s	0	1	0	0	0	0	0	0	0	0	0	0	1	0	0
L	Schmidtella crassimarginata Ulrich	Sccrassi	3	s	0	1	1	0	0	0	0	0	0	0	1	0	0	0	0
L	Schmidtella incompta Ulrich	Scincomp	4	s	0	1	1	0	0	0	0	0	0	1	0	1	0	0	0
O	Cryptophyllus oboloides (Ulrich and Bassler)	Coboloid	4	s	0	1	0	0	0	0	0	0	0	0	0	1	0	0	0
P	Eurychilina reticulata Ulrich	Eurretic	4	s	0	0	0	0	0	0	1	0	0	1	1	0	0	0	0
Pd	Krausella inaequalis Ulrich	Kinaequa	4	s	0	0	0	0	0	0	0	0	0	0	1	0	0	0	1
L	Schmidtella affins Ulrich	Scaffins	4	s	0	0	0	0	0	0	0	0	0	0	0	1	0	0	1
P	Winchellatia longispina Kay, 1940	Winlongi	4	s	0	0	0	0	0	0	1	0	0	0	0	0	0	0	1
Pd	Krausella arcuata Ulrich	Karcuata	4	b	0	0	0	0	0	0	1	0	1	0	1	0	0	0	0
P	Ctenobolbina' ventrospinosa Kraft, 1962	Cteventr	4	b	1	0	0	0	1	0	0	0	0	0	0	0	0	0	0
P	Platybolbina punctata (Kraft, 1962)	Platpunc	4	b	1	1	0	0	0	0	0	0	0	0	0	0	0	0	0
P	Basseleratia typa Kay	Basstypa	4	b	0	0	1	0	0	0	0	0	0	1	0	0	0	0	0
L	Macronotella scofieldi Ulrich	Mascofie	4	b	0	0	0	0	0	0	0	1	0	0	1	1	0	0	0
Pd	Bairdiocypris granti Ulrich	Bytranti	4	b	0	0	0	0	0	0	0	0	0	0	1	0	0	0	1
L	Schmidtella umbonata Ulrich	Scumbona	4	b	0	0	0	0	0	1	0	0	0	0	0	1	0	0	0
B	Byrosolopsina centipunctata (Kay, 1940)	Brycenti	4	b	0	0	0	0	0	0	0	0	0	0	0	1	0	0	1
P	Ceratopsis quadrifida (Jones)	Cerquadr	2	b	0	0	0	0	0	0	0	0	0	1	0	0	0	0	1
B	Pseudulrichia simplex (Ulrich)	Psesimpl	3	b	0	0	0	0	0	0	1	0	0	1	0	0	0	0	1
O	Primitiella constricta Ulrich	Priconst	2	b	0	0	0	0	0	0	1	0	0	1	0	0	0	0	0
P	Tetradella ellipsilira Kay, 1934	Tetellip	4	b	0	0	0	0	0	0	0	0	0	1	0	1	0	0	1
Pd	Macrocyproides trentonensis (Ulrich, 1894)	Macrtrent	4	s	0	0	0	0	0	0	1	0	0	0	0	1	0	0	1
B	Byrsolopsina planilateralis (Kay, 1940)	Bryplani	4	b	0	0	0	0	0	0	1	0	0	0	0	1	0	0	0
P	Eurychilina subradiata Ulrich	Eursubra	4	b	0	0	0	0	0	0	1	1	0	0	1	0	0	1	1
P	Tetradella ulrichi Kay, 1934	Tetulric	4	b	0	0	0	0	0	0	1	0	0	1	0	0	0	0	1
Pd	Phelobythocypris cylindrica Hall	Phelcyli	4	b	0	0	0	0	0	1	1	0	0	1	0	0	0	1	0
L	Hyperchilarina bella Copeland	Hypbella	4	b	0	0	0	0	0	0	1	0	0	0	0	0	0	0	1
P	Laccochilina (Prochilina) irrasa Copeland	Lairrasa	4	b	0	0	0	0	0	0	1	0	0	0	0	0	0	0	1
P	Levisulculus michiganensis Kesling, 1960	Levmichi	4	b	0	0	0	0	0	0	1	1	0	0	0	0	0	0	1
P	Levisulculus planus Copeland	Levplanu	4	b	0	0	0	0	0	0	1	0	0	0	0	0	0	0	1
Pd	?Longiscula emaciata Copeland	Lonemaci	3	b	0	0	0	0	0	0	1	0	0	0	0	0	0	0	1
L	Saccelatia buckensis Copeland	Sabucken	4	b	0	0	0	0	0	0	1	0	0	0	0	0	0	0	1
Pd	Steusloffina ulrichi Teichert	Stulrich	4	b	0	0	0	0	0	0	0	0	0	0	0	0	0	1	1
L	Baltonotella parsispinosa (Kraft, 1962)	Baparsis	3	s	1	1	1	0	1	0	0	0	1	0	0	1	0	0	1
P	Dicranella bicornis Ulrich	Dicbicor	4	b	0	0	0	0	0	0	0	0	1	0	0	0	0	0	1
L	Schmidtella transversa	Sctransv	4	s	0	0	0	0	1	0	0	0	0	0	0	0	0	0	0
P	Eurychilina sunbloodensis Copeland	Eursunbl	4	s	0	0	0	1	0	0	0	0	0	0	0	0	0	0	0
P	Eurychilina bulbinoda Kraft, 1962	Eurbulbi	4	s	1	0	0	0	0	0	0	0	0	0	0	0	0	0	0
O	Primitella anterorotunda Kraft, 1962	Prianter	4	s	1	0	0	0	0	0	0	0	0	0	0	0	0	0	0
Pd	Platyrhomboides virginensis Kraft, 1962	Plavirgi	4	s	1	0	0	0	0	0	0	0	0	0	0	0	0	0	0
P	Hippula cancellata varicata (Harris, 1957)	Hinitens	4	s	0	0	0	0	0	0	0	0	1	0	0	0	0	0	0
Pd	Krausella calvini (Kay, 1940)	Kcalvini	4	s	0	0	0	0	0	0	1	0	0	0	0	0	0	0	0
Pd	Bythocypris? depressoterminata Kraft, 1962	Eurnodos	4	s	1	0	0	0	0	0	0	0	0	0	0	0	0	0	0
P	Eurychilina werneri (Levinson, 1961)	Eurwerne	4	b	0	0	0	0	0	0	0	0	1	0	0	0	0	0	0
L	Aparchites kauffmanensis Swain, 1957	Apkauffm	4	s	0	0	0	0	0	0	0	0	0	0	0	0	0	0	0
L	Aparchites pembertonensis Swain, 1957	Appember	4	s	0	1	1	0	0	0	0	0	0	0	0	0	0	0	0
O	Primitiposis minuta	Prminuta	4	s	0	0	0	0	0	0	0	0	1	0	0	0	0	0	0
Pd	Elliptocyprites longula Swain, 1962	Ellongul	4	s	0	1	0	0	0	0	0	0	0	0	0	0	0	0	0
Pd	Krausella curtispina Kay, 1940	Kcurtispo	4	b	0	0	0	0	0	0	0	0	0	0	1	0	0	0	0
Pd	Bythocypris curta Ulrich	Bytcurta	4	b	0	0	0	0	0	0	0	0	0	0	1	0	0	0	0
L	Hyperchilarina nodosimarginata Harris, 1957	Hypnodos	4	s	0	0	0	0	0	0	0	0	1	0	0	0	0	0	0
P	Bromidella papillata (Harris, 1957)	Bropapil	4	s	0	0	0	0	0	0	0	0	1	0	0	0	0	0	0
L	Schmidtella' excavata	Scexcava	4	s	0	0	0	0	0	0	0	0	1	0	0	0	0	0	0
O	Lomatopisthia auricula (Harris, 1957)	Loauricu	4	b	0	0	0	0	0	0	0	0	1	0	0	0	0	0	0
L	Aparchites ellipticoides Kraft, 1962	Apellipt	3	b	1	0	0	0	0	0	0	0	0	0	0	0	0	0	0
O	Leperditella extensa Kraft, 1962	Lepexten	3	s	1	0	0	0	0	0	0	0	0	0	0	0	0	0	0
O	Conchoprimitia asymmetrica Kraft, 1962	Coasymme	4	s	1	0	0	0	0	0	0	0	0	0	0	0	0	0	0
Pd	Camdenidea? Ordoviciana Kraft, 1962	Camordov	2	s	1	0	0	0	0	0	0	0	0	0	0	0	0	0	0
L	Schmidtella concentodepressa Kraft, 1962	Scconcen	3	s	1	0	0	0	0	0	0	0	0	0	0	0	0	0	0
P	Milleratia tumblingrunensis Kraft, 1962	Mitumbli	4	s	1	0	0	0	0	0	0	0	0	0	0	0	0	0	0
P	Eurychilina mattea Kraft, 1962	Eurmatte	4	s	1	0	0	0	0	0	0	0	0	0	0	0	0	0	0
Pd	Bairdiacypris incurvatus Kraft, 1962	Baiincur	4	s	1	0	0	0	0	0	0	0	0	0	0	0	0	0	0
Pd	Shenandoia? subtriangulata Kraft, 1962	Shesubtr	2	s	1	0	0	0	0	0	0	0	0	0	0	0	0	0	0
Pd	Bythocypris? Rectangulatus Kraft, 1962	Bythrect	3	s	1	0	0	0	0	0	0	0	0	0	0	0	0	0	0
P	Eurychilina minutifoveata Kay, 1940	Eurminut	4	g	0	0	0	0	0	0	0	0	0	0	0	0	0	0	0
Pd	Krausella? spinosa (Harris, 1957)	Kspinosa	2	s	0	0	0	0	0	0	0	0	1	0	0	0	0	0	0
B	Easchmidtella quadrata (Harris, 1957)	Eaquarda	4	s	0	0	0	0	0	0	0	0	1	0	0	0	0	0	0
L	Baltonotella ovalis (Harris, 1957)	Baovalis	4	g	0	0	0	0	0	0	0	0	0	0	0	0	0	0	0
P	Eokloedenella posterodepressa Kraft, 1962	Eokposte	4	b	1	0	0	0	0	0	0	0	0	0	0	0	0	0	0
O	Leperditella jonesinoides Harris, 1957	Lepjones	4	b	0	0	0	0	0	0	0	0	1	0	0	0	0	0	0
O	Leperditella porosa Harris, 1957	Lepporos	4	b	0	0	0	0	0	0	0	0	1	0	0	0	0	0	0
O	'Coelochilina'' alata Harris, 1957	Coealata	4	b	0	0	0	0	0	0	0	0	1	0	0	0	0	0	0
P	'Ctenobolbina'' abrupta	Cteabrup	4	b	0	0	0	0	0	0	0	0	1	0	0	0	0	0	0
P	Milleratia restrictosculata Kraft, 1962	Milrestri	4	b	1	0	0	0	0	0	0	0	0	0	0	0	0	0	0
P	Milleratia anteroextensa Kraft, 1962	Milantero	4	b	1	0	0	0	0	0	0	0	0	0	0	0	0	0	0
P	Hallatia hypercarinata	Hhyperca	4	b	1	0	0	0	0	0	0	0	0	0	0	0	0	0	0
P	Chilobolbina hyposulcata Kraft, 1962	Chihypos	4	b	1	0	0	0	0	0	0	0	0	0	0	0	0	0	0
P	Eurychilina dorsovelata Kraft, 1962	Eurdorso	4	b	1	0	0	0	0	0	0	0	0	0	0	0	0	0	0
P	Thomsatia carinata Kraft, 1962	Thcarina	4	b	1	0	0	0	0	0	0	0	0	0	0	0	0	0	0
Pd	Monoceretella trispinosa Kraft, 1962	Montrisp	4	b	1	0	0	0	0	0	0	0	0	0	0	0	0	0	0
P	Thomsatia marginovelata Kraft, 1962	Thmargin	4	b	1	0	0	0	0	0	0	0	0	0	0	0	0	0	0
Pd	Eographiodactylus eos Kraft, 1962	Eograeos	4	b	1	0	0	0	0	0	0	0	0	0	0	0	0	0	0
B	Aechmina? bispinata Kraft, 1962	Aebispin	2	b	1	0	0	0	0	0	0	0	0	0	0	0	0	0	0
O	Lomatopisthia rectangulata (Kraft, 1962)	Basrecta	3	b	1	0	0	0	0	0	0	0	0	0	0	0	0	0	0
Pd	Macrocyproides sp. cf. M. clermontensis Spivey	Macclerm	2	b	1	0	0	0	0	0	0	0	0	0	0	0	0	0	0
B	Byrsolopsina elkrunensis Swain, 1962	Bryelkru	4	b	0	0	0	0	0	0	0	0	0	0	0	0	0	0	0
P	Levisulculus bifossulus Swain, 1962	Levbifos	4	b	0	0	0	0	0	0	0	0	0	0	0	0	0	0	0
P	Eurychilina incurva Ulrich	Eurincur	4	b	0	0	0	0	0	0	0	0	0	0	1	0	0	0	0
O	Pedomphalella subovata Swain and Cornell	Pedsubov	4	b	0	0	0	0	0	0	0	0	0	0	1	1	0	0	0
L	Aparchites macrus (Ulrich)	Apmacrus	4	b	0	0	0	0	0	0	0	0	0	0	0	1	0	0	0
B	Byrsolopsina ovata (Kay, 1940)	Bryovata	4	b	0	0	0	0	0	0	0	0	0	0	0	1	0	0	0
L	Saccelatia arcuamuralis Kay, 1940	Saarcuam	4	b	0	0	0	0	0	0	0	0	0	0	0	1	0	0	0
B	Bollia subaequata Ulrich, 1894	Bolsubae	4	b	0	0	0	0	0	0	0	0	0	1	0	0	0	0	0
O	Bellornatia tricollis Kay, 1934	Beltrico	4	b	0	0	0	0	0	0	0	0	0	1	0	0	0	0	0
P	Thomasatia falcicosta Kay, 1934	Thofalci	4	b	0	0	0	0	0	0	0	0	0	1	0	0	0	0	0
P	Winchellatia initialis (Ulrich, 1894)	Wininiti	4	b	0	0	0	0	0	1	0	0	0	0	0	0	0	0	0
P	Euprimitia sanctipauli (Ulrich)	Eusancti	4	b	0	0	0	0	0	0	0	0	0	0	0	0	0	0	1
P	Hallatia magnapuncta (Kay, 1934)	Hmagnapu	4	b	0	0	0	0	0	0	0	0	0	1	0	0	0	0	0
P	Hallatia particylindrica Kay, 1934	Hparticy	4	b	0	0	0	0	0	0	1	0	0	0	0	0	0	0	0
P	Raymondatia goniglypta Kay, 1940	Raygonig	4	b	0	0	0	0	0	0	0	0	0	0	1	0	0	0	0
L	Saccelatia bullata Kay, 1940	Sabullat	4	b	0	0	0	0	0	0	0	0	0	0	0	1	0	0	0
L	Aparchites ellipticus Ulrich	Apellipt	4	b	0	0	0	0	0	0	0	0	0	0	0	1	0	0	0
O	Leperditella tumida	Letumida	4	b	0	0	0	0	0	0	0	0	1	0	0	0	0	0	0
L	Aparchites tumidus	Apartumi	4	b	1	0	0	0	0	0	0	0	0	0	0	0	0	0	0
P	Bromidella rhomboides Kay, 1940	Brorhomb	4	b	0	0	0	0	0	0	0	0	0	0	1	0	0	0	0
Pd	Punctaparchites ovatus Kay, 1934	Punovatu	4	b	0	0	0	0	0	0	0	0	0	1	0	0	0	0	0
L	Aparchites paratumida Swain & Cornell, 1961	Appartum	4	b	0	0	0	0	0	0	0	0	0	0	1	1	1	0	0
L	Bullatella granilabiata (Ulrich)	Bulgrani	3	b	0	0	0	0	0	0	0	0	0	0	1	1	1	0	0
P	Drepanella summitensis Johnson et al.	Dresummi	3	b	0	0	0	0	0	0	0	0	0	0	0	0	1	0	0
P	Drepanella bigenris Ulrich	Depbigen	2	b	0	0	0	0	0	0	0	0	0	0	1	0	0	0	0
O	Leperditella canalis Ulrich	Lepcanal	2	b	0	0	0	0	0	0	0	0	0	0	1	0	0	0	0
P	Drepanella cf. D. crassinodoa (Ulrich)	Depcrass	3	b	0	0	0	0	0	0	0	0	0	1	0	0	0	0	0
P	Distobolbina warthini Copeland, 1977	Diswarth	4	b	0	0	0	0	0	0	0	0	0	0	0	0	0	0	1
O	Glymmatobolbina? Spinosa Copeland, 1977	Glyspino	2	b	0	0	0	0	0	0	0	0	0	0	0	0	0	0	1
Pd	Krausella rawsoni Roy	Krawsoni	4	b	0	0	0	0	0	0	0	0	0	0	0	0	0	0	1
Pd	Monoceratella baffensis Copeland, 1977	Monbaffe	4	b	0	0	0	0	0	0	0	0	0	0	0	0	0	0	1
Pd	Monoceratella decorata Copeland, 1977	Mondecor	4	b	0	0	0	0	0	0	0	0	0	0	0	0	0	0	1
P	Oepikella jaynesi (Roy)	Oepjayne	4	b	0	0	0	0	0	0	0	0	0	0	0	0	0	0	1
P	Tetradella buckensis Guber	Tetbucke	4	b	0	0	0	0	0	0	0	0	0	0	0	0	0	0	1
L	Aparchites? labellosus (Jones)	Aplabell	2	b	0	0	0	0	0	0	1	0	0	0	0	0	0	0	0
B	Bollia persulcata (Ulrich, 1879)	Quapersu	4	b	0	0	0	0	0	0	1	0	0	0	0	0	0	0	0
P	Ctenobolbina lucifer Copeland, 1965	Ctlucife	4	b	0	0	0	0	0	0	1	0	0	0	0	0	0	0	0
O	Eridoconcha bifurcata Copeland, 1965	Eribifur	4	b	0	0	0	0	0	0	1	0	0	0	0	0	0	0	0
O	Glymmatobolbibna? magna Copeland, 1965	Glymagna	3	b	0	0	0	0	0	0	1	0	0	0	0	0	0	0	0
P	Hallatia? dubia Copeland, 1965	Hadubia	3	b	0	0	0	0	0	0	1	0	0	0	0	0	0	0	0
L	Hyperchilarina obscura Copeland, 1965	Hyobscur	4	b	0	0	0	0	0	0	1	0	0	0	0	0	0	0	0
O	Leperditella aequilatera? (Ulrich)	Lepaequil	2	b	0	0	0	0	0	0	1	0	0	0	0	0	0	0	0
P	Levisulculus undatus Copeland, 1965	Levundat	4	b	0	0	0	0	0	0	1	0	0	0	0	0	0	0	0
P	Milleratia longisulcata Copeland, 1965	Millongi	4	b	0	0	0	0	0	0	1	0	0	0	0	0	0	0	0
P	Milleratia mica	Millmica	4	b	0	0	0	0	0	0	1	0	0	0	0	0	0	0	0
Pd	Monoceratella spicata Copeland, 1965	Monspica	4	b	0	0	0	0	0	0	1	0	0	0	0	0	0	0	0
P	Norochilina nora Copeland, 1965	Noronora	4	b	0	0	0	0	0	0	1	0	0	0	0	0	0	0	0
P	Oepikella labrosa Copeland, 1965	Oeplabio	4	b	0	0	0	0	0	0	1	0	0	0	0	0	0	0	0
P	Pleurodella costata Copeland, 1965	Plecosta	4	b	0	0	0	0	0	0	1	0	0	0	0	0	0	0	0
O	'Primitia'' harassensis Copeland, 1965	Priharas	4	b	0	0	0	0	0	0	1	0	0	0	0	0	0	0	0
O	Primitiella limbata Ulrich	Prilimba	4	b	0	0	0	0	0	0	1	0	0	0	0	0	0	0	0
B	Pseudulrichia sp. cf. P. bivertex (Ulrich)	Psebiver	4	b	0	0	0	0	0	0	1	0	0	0	0	0	0	0	0
Pd	Pullvillites? wabiensis Copeland, 1965	Pulwabie	3	b	0	0	0	0	0	0	1	0	0	0	0	0	0	0	0
L	Saccelatia angularis (Ulrich)	Saangula	4	b	0	0	0	0	0	0	1	0	0	0	0	0	0	0	0
P	Tetradella Kayi Copeland, 1965	Tetrkayi	4	b	0	0	0	0	0	0	1	0	0	0	0	0	0	0	0
P	Tvaerenella tersa Copeland, 1965	Tvatersa	4	b	0	0	0	0	0	0	1	0	0	0	0	0	0	0	0
P	Wabiella sella Copeland, 1965	Wabsella	4	b	0	0	0	0	0	0	1	0	0	0	0	0	0	0	0
P	Winchellatia? magna Copeland, 1965	Winmagna	3	b	0	0	0	0	0	0	1	0	0	0	0	0	0	0	0
P	Winchellatia? parva Copeland, 1965	Winparva	3	b	0	0	0	0	0	0	1	0	0	0	0	0	0	0	0
P	Platybolbina schadidea Kesling, 1960	Plaschad	4	b	0	0	0	0	0	0	0	1	0	0	0	0	0	0	0
P	platybolbina compsa Kesling, 1960	Placomps	4	b	0	0	0	0	0	0	0	1	0	0	0	0	0	0	0
P	Platybolbina dictyota Kesling, 1960	Pladicto	4	b	0	0	0	0	0	0	0	1	0	0	0	0	0	0	0
P	Platybolbina psedna Kesling, 1960	Plapsedn	4	b	0	0	0	0	0	0	0	1	0	0	0	0	0	0	0
P	Platybolbina omphalota Kesling, 1960	Plaompha	4	b	0	0	0	0	0	0	0	1	0	0	0	0	0	0	0
P	Platybolbina chalazia Kesling, 1960	Plachala	4	b	0	0	0	0	0	0	0	1	0	0	0	0	0	0	0
O	Colacchilina plera Kesling, Hall & Melik, 1960	Colplera	4	b	0	0	0	0	0	0	0	1	0	0	0	0	0	0	0
P	Laccochilina pharcata Kesling, Hall and Melik, 1960	Lacpharc	4	b	0	0	0	0	0	0	0	1	0	0	0	0	0	0	0
P	Hesperidella michiganensis Kesling, Hall & Melik, 1960	Hesmichi	4	b	0	0	0	0	0	0	0	1	0	0	0	0	0	0	0
P	Jonesella gonyloba Warshauer & Berdan, 1982	Jongonyl	4	b	0	0	0	0	0	1	0	0	0	0	0	0	0	0	0
P	Ceratopsis asymmetrica Warshauer & Berdan,1982	Cerasymm	4	b	0	0	0	0	0	1	0	0	0	0	0	0	0	0	0
B	Warthinia nodosa (Ulrich, 1890)	Warnodos	3	b	0	0	0	0	0	1	0	0	0	0	0	0	0	0	0
