# Supplementary material for: Marine Ostracod Provinciality in the Late Ordovician of Palaeocontinental Laurentia and Its Environmental and Geographical Expression
Source: PLoS One. 2012 Aug 10;7(8):e41682. doi: 10.1371/journal.pone.0041682 (PMC3416799; doi:10.1371/journal.pone.0041682)
Supplement: Appendix S3 — Sandbian ( gracilis ) time slab ostracod dataset of palaeocontinental Laurentia. (XLSX) [file pone.0041682.s004.xlsx]

## Sheet: Sheet1
				Localities	Loc 1a	Loc 2a	Loc 2b	Loc 3a	Loc 8a	Loc 13
Ostracod groups					Virginia	New York	New York	Pennsylvania	Oklahoma	Mackenzie
	Note:In column E and row 3, symbol g stands for gracilis, b for bicornis and s represents Sandbian				g	g	g	g	g	g
				Palaeolat	25°S	22°S	22°S	22°S	13°S	13°N
				Palaeolong	251°	248°	248°	243°	228°	248°
				Depth	S	S	S	S	S	S
	Ostracod species	Short names	Weight	age
Pd	Budnianella shenandoense Kraft, 1962	Bushenan	4	g	1	1	0	0	0	0
O	Primitiella anterorotunda Kraft, 1962	Prianter	4	s	1	0	0	1	0	0
P	Dicranella macrocarinata Harris, 1931	Dicmacro	4	g	0	0	0	0	1	1
O	Ectoprimata pustulosa Swain	Ectopust	4	g	0	1	0	0	0	1
Pd	Platyrhomboides quadratus Harris	Plaquadr	4	g	0	0	0	0	1	1
P	Eurychilina indivisa Levinson, 1961	Eurindiv	4	s	1	0	0	0	1	0
P	Hallatia labiosa (Ulrich, 1894)	Hlabiosa	3	s	1	1	0	0	1	0
P	Ectoprimitoides moorei (Harris, 1957)	Ecmoorei	3	s	1	0	0	0	1	0
P	Eurybolbina bispinata (Harris, 1957)	Eurbispi	3	s	1	0	0	0	0	1
P	Eoaquapulex socialis (Levinson, 1961)	Eosocial	3	s	1	0	0	0	1	0
P	Eohollina depressa (Kay, 1940)	Eodepres	3	s	1	0	0	0	1	1
P	Eurychilina bulbinoda Kraft, 1962	Eurbulbi	4	s	1	1	0	0	0	0
O	Primitella anterorotunda Kraft, 1962	Prianter	4	s	1	1	0	0	0	0
Pd	Monoceratella teres Teichert, 1937	Monteres	4	s	1	1	0	0	0	0
Pd	Balticella deckeri (Harris, 1957)	Bdeckeri	4	s	1	0	0	1	0	0
Pd	Platyrhomboides virginensis Kraft, 1962	Plavirgi	4	s	1	1	0	0	0	0
Pd	Krausella variata Kraft, 1962	Kvariata	4	s	1	1	0	0	0	0
Pd	Shenandoia acuminulata Kraft, 1962	Shacumin	4	s	1	0	0	1	0	0
O	Cryptophyllus oboloides (Ulrich and Bassler)	Coboloid	4	s	0	1	0	1	0	1
P	Eurychilina reticulata Ulrich	Eurretic	4	s	0	1	1	0	1	0
L	Schmidtella affins Ulrich	Scaffins	4	s	0	0	0	0	1	1
P	Hippula cancellata varicata (Harris, 1957)	Hinitens	4	s	0	0	0	0	1	1
L	Baltonotella parsispinosa (Kraft, 1962)	Baparsis	3	s	1	1	1	0	1	1
O	Leperditella rex Coryell and Schenck, 1941	Leperrex	4	s	0	1	0	1	0	0
P	Eurychilina sunbloodensis Copeland, 1974	Eursunbl	4	s	0	0	0	0	0	1
L	Baltonotella circulantus (Harris, 1957)	Bacircul	3	s	0	0	0	0	1	0
Pd	Punctaparchites rugosus (Jones, 1858)	Punrugos	3	s	0	0	0	0	1	0
P	Eurychilina ventrosa Ulrich, 1894	Eurventr	4	s	0	0	0	0	1	0
O	Saccelatia millepunctata (Ulrich, 1894)	Sacmille	3	s	0	0	0	1	0	0
Pd	Krausella brevicornis (Keenan, 1951)	Kbrevico	4	s	1	0	0	0	0	0
P	Eurychilina strasburgensis Kraft, 1962	Estrasbu	4	s	0	1	0	1	0	0
L	Schmidtella transversa	Sctransv	4	s	0	0	0	0	1	0
L	Saccelatia arrecta Ulrich	Sarrecta	4	s	0	1	1	0	0	0
O	Leperditella mundula (Ulrich)	Lepmundu	4	s	0	0	0	1	0	0
L	Schmidtella crassimarginata Ulrich	Sccrassi	3	s	0	0	0	0	1	0
L	Schmidtella incompta Ulrich	Scincomp	4	s	0	1	0	0	0	0
Pd	Krausella inaequalis Ulrich	Kinaequa	4	s	0	0	0	0	0	1
P	Winchellatia longispina Kay, 1940	Winlongi	4	s	0	0	0	0	1	0
Pd	Krausella calvini (Kay, 1940)	Kcalvini	4	s	0	0	0	0	1	0
Pd	Macrocyproides trentonensis (Ulrich, 1894)	Macrtrent	4	s	0	1	0	0	0	0
Pd	Bythocypris? depressoterminata Kraft, 1962	Eurnodos	4	s	1	0	0	0	0	0
L	Aparchites kauffmanensis Swain, 1957	Apkauffm	4	s	0	1	0	1	0	0
L	Aparchites pembertonensis Swain, 1957	Appember	4	s	0	1	0	1	0	0
Pd	Elliptocyprites longula Swain, 1962	Ellongul	4	s	0	1	0	0	0	0
O	Primitiella champlainensis Swain, 1957	Prichamp	4	g	0	1	0	0	0	0
P	Euprimitia macropuncta Swain, 1957	Eumacrop	4	g	0	1	0	0	0	0
P	Euprimitia pustulosa Swain, 1957	Eupustul	4	g	0	1	0	0	0	0
O	Conchoprimitia ӧpikana Swain, 1957	Copikana	4	g	0	1	0	0	0	0
P	Eurychilina multipustulosa Swain, 1962	Eurmulti	4	g	0	1	0	0	0	0
P	Eurychilina placida Swain, 1962	Eurplaci	4	g	0	1	0	0	0	0
P	'Ctenobolbina'' clintonensis Swain, 1962	Cteclint	4	g	0	1	0	0	0	0
Pd	Pachydomelloides valcourensis Swain, 1962	Pacvalco	4	g	0	1	0	0	0	0
Pd	Elliptocyprites parallela Swain, 1962	Elparall	4	g	0	1	0	0	0	0
Pd	Budnianella ellipticalis Swain, 1962	Buellipt	4	g	0	1	0	0	0	0
Pd	Budnianella nodosa Swain, 1962	Bunodosa	4	g	0	1	0	0	0	0
Pd	Parasclerites lamellosus Swain, 1962	Palamell	4	g	0	1	0	0	0	0
Pd	Parasclerites elongatus Swain, 1962	Palamell	4	g	0	1	0	0	0	0
Pd	Acanthoscapha champlainensis Swain, 1962	Acchampl	4	g	0	1	0	0	0	0
P	Bromidella? parsinoda Kraft, 1962	Broparsi	2	g	1	0	0	0	0	0
O	Lomatopisthia varicata	Lovarica	4	g	0	0	0	0	1	0
O	Lomatopisthia simplex	Losimple	4	g	0	0	0	0	1	0
O	Cryptophyllus nuculopsis Harris, 1957	Crynucul	4	g	0	0	0	0	1	0
L	Schmidtella' asymmetrica	Scasymme	4	g	0	0	0	0	1	0
L	Schmidtella' minuta	Scminuta	4	g	0	0	0	0	1	0
O	Eridoconcha simpsoni Harris, 1931	Erisimps	4	g	0	0	0	0	1	0
O	Cryptophyllus gibbossum Harris, 1957	Crygibbo	4	g	0	0	0	0	1	0
P	Bromidella reticulata Harris, 1931	Broreticu	4	g	0	0	0	0	1	0
P	Anisocyamus elegans (Harris, 1957)	Anielega	3	g	0	0	0	0	1	0
P	Anisocyamus basseleri (Harris, 1957)	Anibasse	3	s	0	0	0	0	1	0
O	Primitiopsis excavata	Priexcav	3	g	0	0	0	0	1	0
O	Kayina hybosa Harris, 1957	Kahybosa	4	g	0	0	0	0	1	0
P	'Ctenobolbina' inflata (Harris, 1957)	Cteinfla	3	g	0	0	0	0	1	0
O	Primitiella minima	Priminim	4	g	0	0	0	0	1	0
Pd	Monoceratella? brevispinata (Harris, 1957)	Monbrevi	2	g	0	0	0	0	1	0
O	Eoprimitia bailyana (Jones & Holl)	Eopbaily	2	g	0	0	0	0	1	0
P	Ludvigsenites mackenziensis Copeland, 1982	Ludvmacke	4	g	0	0	0	0	0	1
P	Eurychilina prairiensis Copeland	Eurprair	4	g	0	0	0	0	0	1
P	Euprimita? krafti Copeland, 1982	Eukrafti	3	g	0	0	0	0	0	1
P	Piretia mackenziensis Copeland, 1982	Pirmacke	4	g	0	0	0	0	0	1
P	Tetradella harrissi Copeland, 1982	Tetharri	4	g	0	0	0	0	0	1
P	Canadabolbina multispinosa Copeland, 1982	Canmulti	4	g	0	0	0	0	0	1
P	Winchellatia nahanniensis Copeland, 1982	Winnahan	4	g	0	0	0	0	0	1
P	Bolbopisthia ludvigseni Copeland	Bolludvi	4	g	0	0	0	0	0	1
P	Bolbopisthia cf. B. lenzi Copeland	Bollenzi	3	g	0	0	0	0	0	1
P	Tetradella perplexa Copeland	Tetperpl	4	g	0	0	0	0	0	1
P	Echinoprimitia? spinosa Copeland, 1982	Ecspinos	2	g	0	0	0	0	0	1
P	Eokloedenella whittakerenisis Copeland	Eokwhitt	4	g	0	0	0	0	0	1
O	Leperditella cf. L. germana (Ulrich)	Lepgerma	2	g	0	0	0	0	0	1
O	Cryptophyllus magnus (Harris)	Crymagnu	3	g	0	0	0	0	0	1
P	Nahanniopsis schallreuteri Copeland, 1982	Nahschal	4	g	0	0	0	0	0	1
Pd	Bolboscapha chattertoni Copeland, 1982	Bolchatt	4	g	0	0	0	0	0	1
Pd	Krausella minuta? Harris	Krminuta	3	g	0	0	0	0	0	1
Pd	Steusloffina borealis Copeland	Steborea	4	g	0	0	0	0	0	1
P	Tetradella henningsmoei Copeland, 1982	TetHarri	4	g	0	0	0	0	0	1
P	Echinoprimitia imputata Harris, 1957	Ecimputa	4	g	0	0	0	0	0	1
L	Hyperchilarina nodosimarginata Harris, 1957	Hypnodos	4	s	0	0	0	0	1	0
P	Bromidella papillata (Harris, 1957)	Bropapil	4	s	0	0	0	0	1	0
L	Schmidtella' excavata	Scexcava	4	s	0	0	0	0	1	0
L	Aparchites ellipticoides Kraft, 1962	Apellipt	3	b	1	0	0	0	0	0
O	Leperditella extensa Kraft, 1962	Lepexten	3	s	1	0	0	0	0	0
O	Conchoprimitia asymmetrica Kraft, 1962	Coasymme	4	s	1	0	0	0	0	0
Pd	Camdenidea? Ordoviciana Kraft, 1962	Camordov	2	s	1	0	0	0	0	0
L	Schmidtella concentodepressa Kraft, 1962	Scconcen	3	s	1	0	0	0	0	0
P	Milleratia tumblingrunensis Kraft, 1962	Mitumbli	4	s	1	0	0	0	0	0
P	Eurychilina mattea Kraft, 1962	Eurmatte	4	s	1	0	0	0	0	0
Pd	Bairdiacypris incurvatus Kraft, 1962	Baiincur	4	s	1	0	0	0	0	0
Pd	Shenandoia? subtriangulata Kraft, 1962	Shesubtr	2	s	1	0	0	0	0	0
Pd	Bythocypris? Rectangulatus Kraft, 1962	Bythrect	3	s	1	0	0	0	0	0
P	Eurychilina minutifoveata Kay, 1940	Eurminut	4	g	0	1	0	0	0	0
Pd	Krausella? spinosa (Harris, 1957)	Kspinosa	2	s	0	0	0	0	1	0
L	Baltonotella ovalis (Harris, 1957)	Baovalis	4	g	0	0	0	0	1	0
